# Supplementary material for: Carpel size, grain filling, and morphology determine individual grain weight in wheat
Source: PubMed Central journal article supplement (PMC4623684; doi:10.1093/jxb/erv378), 2015-08-05
Supplement: supp_erv378_jexbot151548_file001.pdf [file supp_erv378_jexbot151548_file001.pdf]

## **Supplementary data**

# **Carpel size, grain filling and morphology determine individual grain weight in wheat**

**Quan Xie, Sean Mayes and Debbie L. Sparkes**

**Supplementary Table S1.** Descriptive statistics on the final grain weight and grain filling traits of the parents and recombinant inbred line (RIL) mapping population.

**Supplementary Table S2.** Quantitative trait locus (QTL) identification for grain weight, carpel size, grain dry matter and water accumulation, and grain dimensions.

**Supplementary Table S3.** Quantitative trait locus (QTL) coincidences between final grain weight and grain filling traits.

**Supplementary Table S4.** Quantitative trait locus (QTL) coincidences between carpel size and the other grain filling traits.

**Supplementary Table S5.** Quantitative trait locus (QTL) number detected for Grain 1, 2 and 3.

**Supplementary Fig. S1.** Grain expansion dynamics in 2013.

**Supplementary Fig. S2.** Quantitative trait locus (QTL) comparisons between different grains within spikelets.

**Supplementary Table S1.** Descriptive statistics on the final grain weight and grain filling traits of the parents and recombinant inbred line (RIL) mapping population

| Trait <sup>a</sup>                   | Year | Parental lines |            |         | RILs                 |         |                  | H <sup>2c</sup> |
|--------------------------------------|------|----------------|------------|---------|----------------------|---------|------------------|-----------------|
|                                      |      | Forno          | Oberkulmer | P-value | Mean (min; max)      | P-value | SED <sup>b</sup> |                 |
| <b>Final grain weight</b>            |      |                |            |         |                      |         |                  |                 |
| Grain 1 (mg)                         | 2012 | 46.0           | 49.7       | > 0.05  | 45.4 (30.5; 63.0)    | < 0.001 | 3.4              | 0.81            |
|                                      | 2013 | 57.3           | 45.7       | < 0.01  | 47.8 (35.5; 60.4)    | < 0.001 | 1.7              |                 |
| Grain 2 (mg)                         | 2012 | 44.1           | 58.8       | < 0.01  | 50.5 (38.0; 65.1)    | < 0.001 | 4.1              | 0.70            |
|                                      | 2013 | 57.3           | 55.9       | > 0.05  | 54.2 (45.0; 66.1)    | < 0.001 | 2.0              |                 |
| Grain 3 (mg)                         | 2012 | 32.7           | 39.7       | > 0.05  | 37.9 (17.8; 51.5)    | < 0.001 | 5.7              | 0.67            |
|                                      | 2013 | 49.2           | 44.8       | > 0.05  | 45.9 (33.6; 58.3)    | < 0.001 | 2.6              |                 |
| <b>Carpel size at anthesis</b>       |      |                |            |         |                      |         |                  |                 |
| Carpel 1 (mg)                        | 2012 | 0.73           | 1.07       | < 0.01  | 0.91 (0.57; 1.27)    | < 0.001 | 0.12             | 0.61            |
|                                      | 2013 | 0.60           | 0.87       | < 0.01  | 0.72 (0.48; 1.09)    | < 0.001 | 0.08             |                 |
| Carpel 2 (mg)                        | 2012 | 0.66           | 0.95       | < 0.01  | 0.82 (0.57; 1.12)    | < 0.001 | 0.10             | 0.41            |
|                                      | 2013 | 0.46           | 0.67       | < 0.01  | 0.59 (0.45; 0.80)    | < 0.001 | 0.06             |                 |
| Carpel 3 (mg)                        | 2012 | 0.36           | 0.53       | < 0.05  | 0.52 (0.23; 0.78)    | < 0.001 | 0.08             | 0.38            |
|                                      | 2013 | 0.40           | 0.45       | > 0.05  | 0.39 (0.27; 0.59)    | < 0.001 | 0.05             |                 |
| <b>Grain dry matter accumulation</b> |      |                |            |         |                      |         |                  |                 |
| <b>Grain 1</b>                       |      |                |            |         |                      |         |                  |                 |
| Initial GFR (mg °Cd <sup>-1</sup> )  | 2012 | 0.047          | 0.047      | > 0.05  | 0.042 (0.026; 0.056) | < 0.001 | 0.005            | 0.28            |
|                                      | 2013 | 0.043          | 0.025      | < 0.05  | 0.037 (0.011; 0.055) | < 0.001 | 0.008            |                 |
| Rapid GFR (mg °Cd <sup>-1</sup> )    | 2012 | 0.085          | 0.090      | > 0.05  | 0.085 (0.052; 0.135) | < 0.001 | 0.011            | 0.72            |
|                                      | 2013 | 0.123          | 0.096      | < 0.05  | 0.103 (0.064; 0.151) | < 0.001 | 0.011            |                 |
| Late GFR (mg °Cd <sup>-1</sup> )     | 2012 | 0.018          | 0.020      | > 0.05  | 0.019 (0.011; 0.035) | < 0.001 | 0.003            | 0.43            |
|                                      | 2013 | 0.030          | 0.027      | > 0.05  | 0.025 (0.013; 0.074) | < 0.001 | 0.006            |                 |
| Average GFR (mg °Cd <sup>-1</sup> )  | 2012 | 0.050          | 0.052      | > 0.05  | 0.049 (0.031; 0.070) | < 0.001 | 0.004            | 0.84            |
|                                      | 2013 | 0.065          | 0.049      | < 0.01  | 0.055 (0.040; 0.079) | < 0.001 | 0.003            |                 |
| Maximum GFR (mg °Cd <sup>-1</sup> )  | 2012 | 0.103          | 0.108      | > 0.05  | 0.102 (0.063; 0.161) | < 0.001 | 0.012            | 0.70            |
|                                      | 2013 | 0.146          | 0.117      | < 0.05  | 0.124 (0.081; 0.229) | < 0.001 | 0.014            |                 |
| Onset of GF (°Cd)                    | 2012 | 61             | 76         | > 0.05  | 76 (25; 154)         | < 0.05  | 29               | 0.25            |
|                                      | 2013 | 114            | 151        | > 0.05  | 105 (0; 236)         | < 0.001 | 39               |                 |
| GF duration (°Cd)                    | 2012 | 906            | 943        | > 0.05  | 928 (783; 1094)      | < 0.05  | 70               | 0.21            |
|                                      | 2013 | 857            | 883        | > 0.05  | 847 (690; 1082)      | < 0.001 | 63               |                 |
| <i>t</i> <sub>max</sub> (°Cd)        | 2012 | 391            | 415        | > 0.05  | 408 (356; 481)       | < 0.01  | 24.7             | 0.52            |
|                                      | 2013 | 404            | 437        | < 0.05  | 395 (355; 469)       | < 0.001 | 15               |                 |

<sup>a</sup> Trait abbreviations: GFR, grain filling rate; GF, grain filling; *t*<sub>max</sub>, the time at maximum grain filling rate; *t*<sub>mwc</sub>, the time at maximum grain water content.

<sup>b</sup> SED: standard error of the difference of mean.

<sup>c</sup> H<sup>2</sup>: broad sense heritability.

**Supplementary Table S1. (continued)**

| Trait                                         | Year | Parental lines |            |         | RILs                 |         |       | H <sup>2</sup> |
|-----------------------------------------------|------|----------------|------------|---------|----------------------|---------|-------|----------------|
|                                               |      | Forno          | Oberkulmer | P-value | Mean (min; max)      | P-value | SED   |                |
| <b>Grain 2</b>                                |      |                |            |         |                      |         |       |                |
| Initial GFR (mg °Cd <sup>-1</sup> )           | 2012 | 0.042          | 0.050      | > 0.05  | 0.041 (0.026; 0.056) | < 0.05  | 0.007 | 0.20           |
|                                               | 2013 | 0.046          | 0.025      | < 0.05  | 0.038 (0.020; 0.056) | < 0.001 | 0.008 |                |
| Rapid GFR (mg °Cd <sup>-1</sup> )             | 2012 | 0.093          | 0.109      | > 0.05  | 0.101 (0.063; 0.130) | < 0.001 | 0.014 | 0.71           |
|                                               | 2013 | 0.124          | 0.123      | > 0.05  | 0.120 (0.090; 0.147) | < 0.001 | 0.012 |                |
| Late GFR (mg °Cd <sup>-1</sup> )              | 2012 | 0.022          | 0.025      | > 0.05  | 0.024 (0.014; 0.035) | < 0.01  | 0.005 | 0.49           |
|                                               | 2013 | 0.029          | 0.035      | > 0.05  | 0.031 (0.020; 0.054) | < 0.05  | 0.006 |                |
| Average GFR (mg °Cd <sup>-1</sup> )           | 2012 | 0.052          | 0.061      | < 0.05  | 0.056 (0.038; 0.069) | < 0.001 | 0.004 | 0.80           |
|                                               | 2013 | 0.066          | 0.061      | > 0.05  | 0.063 (0.049; 0.075) | < 0.001 | 0.004 |                |
| Maximum GFR (mg °Cd <sup>-1</sup> )           | 2012 | 0.111          | 0.130      | > 0.05  | 0.121 (0.076; 0.155) | < 0.001 | 0.016 | 0.69           |
|                                               | 2013 | 0.146          | 0.149      | > 0.05  | 0.144 (0.107; 0.195) | < 0.001 | 0.017 |                |
| Onset of GF (°Cd)                             | 2012 | 80             | 98         | > 0.05  | 103 (32; 179)        | < 0.001 | 29    | 0.35           |
|                                               | 2013 | 104            | 187        | < 0.05  | 124 (37; 202)        | < 0.05  | 36    |                |
| GF duration (°Cd)                             | 2012 | 839            | 953        | > 0.05  | 906 (711; 1104)      | < 0.01  | 79    | 0.24           |
|                                               | 2013 | 853            | 874        | > 0.05  | 850 (694; 1022)      | < 0.001 | 62    |                |
| <i>t</i> <sub>max</sub> (°Cd)                 | 2012 | 376            | 432        | < 0.05  | 416 (346; 475)       | < 0.001 | 26    | 0.46           |
|                                               | 2013 | 396            | 455        | < 0.01  | 408 (363; 490)       | < 0.001 | 18    |                |
| <b>Grain 3</b>                                |      |                |            |         |                      |         |       |                |
| Initial GFR (mg °Cd <sup>-1</sup> )           | 2012 | 0.026          | 0.002      | < 0.01  | 0.021 (0.000; 0.036) | < 0.001 | 0.008 | 0.27           |
|                                               | 2013 | 0.033          | 0.013      | < 0.05  | 0.025 (0.000; 0.049) | < 0.001 | 0.009 |                |
| Rapid GFR (mg °Cd <sup>-1</sup> )             | 2012 | 0.070          | 0.070      | > 0.05  | 0.080 (0.036; 0.118) | < 0.001 | 0.015 | 0.45           |
|                                               | 2013 | 0.119          | 0.103      | > 0.05  | 0.107 (0.057; 0.141) | < 0.001 | 0.013 |                |
| Late GFR (mg °Cd <sup>-1</sup> )              | 2012 | 0.019          | 0.155      | < 0.01  | 0.031 (0.007; 0.100) | < 0.001 | 0.018 | 0.31           |
|                                               | 2013 | 0.030          | 0.037      | > 0.05  | 0.035 (0.015; 0.132) | < 0.001 | 0.011 |                |
| Average GFR (mg °Cd <sup>-1</sup> )           | 2012 | 0.039          | 0.076      | < 0.01  | 0.044 (0.024; 0.063) | < 0.001 | 0.007 | 0.59           |
|                                               | 2013 | 0.061          | 0.051      | > 0.05  | 0.056 (0.039; 0.073) | < 0.001 | 0.005 |                |
| Maximum GFR (mg °Cd <sup>-1</sup> )           | 2012 | 0.088          | 0.323      | < 0.01  | 0.113 (0.046; 0.217) | < 0.001 | 0.042 | 0.42           |
|                                               | 2013 | 0.141          | 0.135      | > 0.05  | 0.139 (0.085; 0.272) | < 0.001 | 0.029 |                |
| Onset of GF (°Cd)                             | 2012 | 92             | 268        | < 0.01  | 160 (21; 291)        | < 0.001 | 50    | 0.39           |
|                                               | 2013 | 138            | 237        | < 0.05  | 162 (0; 310)         | < 0.001 | 46    |                |
| GF duration (°Cd)                             | 2012 | 862            | 526        | < 0.05  | 880 (510; 1555)      | < 0.001 | 135   | 0.25           |
|                                               | 2013 | 813            | 846        | > 0.05  | 824 (576; 1139)      | < 0.001 | 94    |                |
| <i>t</i> <sub>max</sub> (°Cd)                 | 2012 | 392            | 369        | > 0.05  | 441 (331; 676)       | < 0.01  | 55    | 0.26           |
|                                               | 2013 | 401            | 475        | < 0.01  | 421 (328; 501)       | < 0.001 | 26    |                |
| <b>Grain water accumulation</b>               |      |                |            |         |                      |         |       |                |
| <b>Grain 1</b>                                |      |                |            |         |                      |         |       |                |
| Maximum grain water content (mg)              | 2012 | 36.4           | 37.7       | > 0.05  | 36.3 (22.9; 52.2)    | < 0.001 | 2.1   | 0.91           |
|                                               | 2013 | 48.7           | 31.8       | < 0.01  | 37.1 (25.3; 56.6)    | < 0.001 | 1.8   |                |
| Water absorption rate (mg °Cd <sup>-1</sup> ) | 2012 | 0.079          | 0.067      | < 0.05  | 0.073 (0.049; 0.104) | < 0.001 | 0.005 | 0.87           |
|                                               | 2013 | 0.099          | 0.061      | < 0.01  | 0.078 (0.046; 0.119) | < 0.001 | 0.005 |                |
| Water loss rate (mg °Cd <sup>-1</sup> )       | 2012 | 0.055          | 0.081      | < 0.01  | 0.066 (0.034; 0.092) | < 0.001 | 0.010 | 0.75           |
|                                               | 2013 | 0.069          | 0.052      | < 0.01  | 0.054 (0.037; 0.084) | < 0.001 | 0.004 |                |
| <i>t</i> <sub>mwc</sub> (°Cd)                 | 2012 | 458            | 565        | < 0.01  | 503 (426; 584)       | < 0.001 | 36    | 0.17           |
|                                               | 2013 | 492            | 523        | > 0.05  | 476 (415; 603)       | < 0.001 | 20    |                |

**Supplementary Table S1. (continued)**

| Trait                                         | Year | Parental lines |            |         | RILs                 |         |       | H <sup>2</sup> |
|-----------------------------------------------|------|----------------|------------|---------|----------------------|---------|-------|----------------|
|                                               |      | Forno          | Oberkulmer | P-value | Mean (min; max)      | P-value | SED   |                |
| <b>Grain 2</b>                                |      |                |            |         |                      |         |       |                |
| Maximum grain water content (mg)              | 2012 | 38.1           | 47.5       | < 0.01  | 42.0 (29.0; 54.0)    | < 0.001 | 2.7   | 0.86           |
|                                               | 2013 | 51.8           | 41.0       | < 0.01  | 43.3 (32.1; 55.0)    | < 0.001 | 2.3   |                |
| Water absorption rate (mg °Cd <sup>-1</sup> ) | 2012 | 0.089          | 0.082      | > 0.05  | 0.083 (0.060; 0.109) | < 0.001 | 0.008 | 0.81           |
|                                               | 2013 | 0.107          | 0.071      | < 0.01  | 0.089 (0.059; 0.125) | < 0.001 | 0.006 |                |
| Water loss rate (mg °Cd <sup>-1</sup> )       | 2012 | 0.057          | 0.110      | < 0.01  | 0.079 (0.047; 0.114) | < 0.001 | 0.013 | 0.70           |
|                                               | 2013 | 0.073          | 0.076      | > 0.05  | 0.066 (0.049; 0.086) | < 0.001 | 0.005 |                |
| <i>t</i> <sub>mwc</sub> (°Cd)                 | 2012 | 429            | 582        | < 0.01  | 508 (431; 583)       | < 0.001 | 39    | 0.52           |
|                                               | 2013 | 483            | 575        | < 0.01  | 489 (425; 596)       | < 0.001 | 25    |                |
| <b>Grain 3</b>                                |      |                |            |         |                      |         |       |                |
| Maximum grain water content (mg)              | 2012 | 26.4           | 43.8       | < 0.01  | 30.1 (13.5; 41.7)    | < 0.001 | 4.6   | 0.67           |
|                                               | 2013 | 43.6           | 30.2       | < 0.01  | 35.5 (23.5; 50.7)    | < 0.001 | 2.8   |                |
| Water absorption rate (mg °Cd <sup>-1</sup> ) | 2012 | 0.060          | 0.068      | > 0.05  | 0.058 (0.033; 0.080) | < 0.001 | 0.011 | 0.43           |
|                                               | 2013 | 0.089          | 0.050      | < 0.01  | 0.070 (0.043; 0.101) | < 0.001 | 0.008 |                |
| Water loss rate (mg °Cd <sup>-1</sup> )       | 2012 | 0.042          | 0.134      | < 0.01  | 0.061 (0.019; 0.108) | < 0.001 | 0.015 | 0.65           |
|                                               | 2013 | 0.062          | 0.062      | > 0.05  | 0.056 (0.036; 0.115) | < 0.001 | 0.010 |                |
| <i>t</i> <sub>mwc</sub> (°Cd)                 | 2012 | 442            | 647        | < 0.01  | 525 (391; 688)       | < 0.001 | 61    | 0.43           |
|                                               | 2013 | 494            | 616        | < 0.01  | 507 (427; 652)       | < 0.001 | 42    |                |
| <b>Grain dimensions at maturity</b>           |      |                |            |         |                      |         |       |                |
| Grain length (mm)                             | 2012 | 6.5            | 7.8        | < 0.01  | 7.2 (6.2; 8.2)       | < 0.001 | 0.2   | 0.79           |
|                                               | 2013 | 7.0            | 8.2        | < 0.01  | 7.5 (6.3; 8.6)       | < 0.001 | 0.3   |                |
| Grain width (mm)                              | 2012 | 3.4            | 3.2        | > 0.05  | 3.3 (3.0; 3.6)       | < 0.001 | 0.1   | 0.55           |
|                                               | 2013 | 3.3            | 3.1        | > 0.05  | 3.2 (2.9; 3.5)       | < 0.001 | 0.1   |                |
| Grain height (mm)                             | 2012 | 2.8            | 2.8        | > 0.05  | 2.8 (2.5; 3.2)       | < 0.001 | 0.09  | 0.73           |
|                                               | 2013 | 3.0            | 2.8        | > 0.05  | 2.8 (2.5; 3.3)       | < 0.001 | 0.1   |                |
| Grain volume (mm <sup>3</sup> )               | 2012 | 32.4           | 37.8       | < 0.05  | 35.3 (27.0; 43.9)    | < 0.001 | 2.4   | 0.68           |
|                                               | 2013 | 35.6           | 37.8       | > 0.05  | 35.3 (26.8; 47.8)    | < 0.001 | 2.7   |                |
| Grain length/width                            | 2012 | 1.9            | 2.4        | < 0.01  | 2.2 (1.9; 2.4)       | < 0.001 | 0.07  | 0.81           |
|                                               | 2013 | 2.1            | 2.6        | < 0.01  | 2.4 (2.0; 2.9)       | < 0.001 | 0.1   |                |
| Grain length/height                           | 2012 | 2.3            | 2.8        | < 0.01  | 2.6 (2.2; 2.9)       | < 0.001 | 0.08  | 0.79           |
|                                               | 2013 | 2.3            | 2.9        | < 0.01  | 2.6 (2.2; 3.2)       | < 0.001 | 0.1   |                |

**Supplementary Table S2.** Quantitative trait locus (QTL) identification for grain weight, carpel size, grain dry matter and water accumulation, and grain dimensions

| Trait/Chromosome          | Year | Position (cM) | LOD  | R <sup>2a</sup> | Additive effect <sup>b</sup> | Closest marker      |
|---------------------------|------|---------------|------|-----------------|------------------------------|---------------------|
| <b>Final grain weight</b> |      |               |      |                 |                              |                     |
| <b>Grain 1</b>            |      |               |      |                 |                              |                     |
| 2A                        | 2012 | 94.9          | 3.14 | 18.7            | -3.02                        | <i>Xpsr919b-2A</i>  |
|                           | 2013 | 142.1         | 3.14 | 12.3            | -1.86                        | <i>Xglk699b-2AL</i> |
| 2B                        | 2013 | 145.8         | 3.16 | 12.4            | -1.83                        | <i>Xglk699a-2BS</i> |
| 3B                        | 2013 | 1.0           | 4.76 | 18.1            | 2.36                         | <i>Xpsr1327a-3B</i> |
| 4A                        | 2012 | 21.7          | 5.54 | 30.5            | -4.52                        | <i>Xpsr59a-4A</i>   |
| 5A                        | 2013 | 209.9         | 8.70 | 30.5            | 3.37                         | <i>Xpsr918b-5A</i>  |
| 5DL                       | 2012 | 36.0          | 3.55 | 20.8            | -6.71                        | <i>Xpsr580a-5DL</i> |
|                           | 2013 | 48.0          | 5.48 | 20.5            | -4.45                        | <i>Xpsr580a-5DL</i> |
| 7B                        | 2012 | 70.7          | 3.54 | 20.8            | 3.29                         | <i>Xglk549-7B</i>   |
|                           | 2012 | 189.5         | 3.75 | 21.9            | 4.82                         | <i>Xmwig710a-7B</i> |
| 7D                        | 2013 | 84.8          | 4.06 | 15.6            | 2.45                         | <i>Xpsr662-7D</i>   |
| <b>Grain 2</b>            |      |               |      |                 |                              |                     |
| 2A                        | 2013 | 143.4         | 3.20 | 12.6            | -1.62                        | <i>PL_AP-2A</i>     |
| 3B                        | 2012 | 80.5          | 4.17 | 24.0            | 3.49                         | <i>Xpsr1054-3B</i>  |
|                           | 2013 | 1.9           | 3.66 | 14.2            | 1.76                         | <i>C970a-3B</i>     |
|                           | 2013 | 80.5          | 5.47 | 20.5            | 2.14                         | <i>Xpsr1054-3B</i>  |
| 4A                        | 2012 | 21.7          | 5.80 | 31.7            | -4.53                        | <i>Xpsr59a-4A</i>   |
|                           | 2013 | 32.2          | 4.01 | 15.4            | -2.10                        | <i>Xpsr59a-4A</i>   |
| 7B                        | 2012 | 217.4         | 3.56 | 20.9            | 3.10                         | <i>Xglk576-7BL</i>  |
| 7D                        | 2013 | 92.8          | 3.37 | 13.2            | 1.84                         | <i>Xgwm111b-7D</i>  |
| <b>Grain 3</b>            |      |               |      |                 |                              |                     |
| 2A                        | 2013 | 90.9          | 4.91 | 18.6            | -2.28                        | <i>Xpsr151-2A</i>   |
| 3B                        | 2013 | 80.5          | 3.38 | 13.2            | 2.03                         | <i>Xpsr1054-3B</i>  |
| 4A                        | 2012 | 21.7          | 4.16 | 23.9            | -4.14                        | <i>Xpsr59a-4A</i>   |
|                           | 2013 | 24.7          | 4.72 | 17.9            | -2.64                        | <i>Xpsr59a-4A</i>   |
| 5A                        | 2013 | 227.4         | 3.29 | 12.9            | -2.18                        | <i>Xpsr1201a-5A</i> |
| 7B                        | 2012 | 217.0         | 3.46 | 20.3            | 3.22                         | <i>Xglk576-7BL</i>  |
|                           | 2013 | 15.6          | 3.28 | 12.8            | 2.16                         | <i>Xpsr952-7B</i>   |
| <b>Carpel size</b>        |      |               |      |                 |                              |                     |
| <b>Carpel 1</b>           |      |               |      |                 |                              |                     |
| 2A                        | 2013 | 153.5         | 2.95 | 11.6            | -0.04                        | <i>Xglk278a-2AL</i> |
| 3B                        | 2013 | 1.9           | 5.36 | 20.1            | 0.05                         | <i>C970a-3B</i>     |
| 4A                        | 2012 | 27.2          | 4.07 | 23.5            | -0.079                       | <i>Xpsr59a-4A</i>   |
| 5A                        | 2013 | 210.9         | 6.20 | 22.9            | 0.06                         | <i>Xpsr918b-5A</i>  |
| 5B                        | 2013 | 7.9           | 3.32 | 13.0            | -0.05                        | <i>Xwg669-5B</i>    |
| 5DL                       | 2013 | 67.8          | 4.62 | 17.6            | -0.05                        | <i>Xpsr580a-5DL</i> |
| 6A                        | 2013 | 4.0           | 3.75 | 14.5            | -0.05                        | <i>Xpsr563a-6A</i>  |

<sup>a</sup> R<sup>2</sup>: the proportion of phenotypic variation explained by individual QTL.

<sup>b</sup> Positive additive effects indicate that the alleles from Forno increase the values of the traits, whereas negative additive effects indicate that the alleles from Oberkulmer increase the values of the traits.

**Supplementary Table S2. (continued)**

| Trait/Chromosome                     | Year | Position (cM) | LOD  | R <sup>2</sup> | Additive effect | Closest marker      |
|--------------------------------------|------|---------------|------|----------------|-----------------|---------------------|
| <b>Carpel 2</b>                      |      |               |      |                |                 |                     |
| 3B                                   | 2013 | 1.9           | 4.30 | 16.5           | 0.03            | <i>C970a-3B</i>     |
| 4A                                   | 2012 | 27.2          | 3.78 | 22.0           | -0.060          | <i>Xpsr59a-4A</i>   |
| 5A                                   | 2012 | 58.3          | 3.29 | 19.4           | 0.066           | <i>Xglk424-5A</i>   |
| 5DL                                  | 2013 | 67.7          | 3.60 | 14.0           | -0.03           | <i>Xpsr580a-5DL</i> |
| <b>Carpel 3</b>                      |      |               |      |                |                 |                     |
| 5A                                   | 2012 | 62.3          | 4.32 | 24.8           | 0.073           | <i>Xglk424-5A</i>   |
| 7B                                   | 2012 | 51.9          | 3.93 | 22.8           | -0.061          | <i>Xpsr690-7B</i>   |
| <b>Grain dry matter accumulation</b> |      |               |      |                |                 |                     |
| <b>Grain 1</b>                       |      |               |      |                |                 |                     |
| Initial grain filling rate           |      |               |      |                |                 |                     |
| 2A                                   | 2012 | 125.7         | 2.90 | 17.0           | -0.0038         | <i>Xglk699b-2AL</i> |
| 4A                                   | 2012 | 33.2          | 3.37 | 19.9           | -0.0032         | <i>Xpsr914-4A</i>   |
| 5A                                   | 2012 | 212.9         | 2.90 | 17.3           | 0.0030          | <i>Xpsr918b-5A</i>  |
| 5DL                                  | 2012 | 40.0          | 2.93 | 17.5           | -0.0054         | <i>Xpsr580a-5DL</i> |
| 7B                                   | 2012 | 194.5         | 3.22 | 19.1           | 0.0039          | <i>Xmwig710a-7B</i> |
| Rapid grain filling rate             |      |               |      |                |                 |                     |
| 1A                                   | 2012 | 80.1          | 3.28 | 19.4           | -0.0071         | <i>Xpsr1327b-1A</i> |
| 1DS                                  | 2013 | 0.1           | 3.38 | 13.2           | 0.0057          | <i>Xpsr168-1DS</i>  |
| 2A                                   | 2013 | 142.1         | 3.19 | 12.5           | -0.0055         | <i>Xglk699b-2AL</i> |
| 3B                                   | 2013 | 13.1          | 3.35 | 13.1           | 0.0065          | <i>Xpsr1196b-3B</i> |
|                                      | 2013 | 51.9          | 3.40 | 13.3           | 0.0059          | <i>Xpsr1101b-3B</i> |
| 4A                                   | 2012 | 18.7          | 3.04 | 18.1           | -0.0077         | <i>Xglk315-4AS</i>  |
| 5A                                   | 2013 | 211.9         | 7.64 | 27.4           | 0.0092          | <i>Xpsr918b-5A</i>  |
| 5DL                                  | 2013 | 40.0          | 5.54 | 20.7           | -0.0147         | <i>Xpsr580a-5DL</i> |
| Late grain filling rate              |      |               |      |                |                 |                     |
| 1A                                   | 2012 | 80.1          | 3.33 | 19.7           | -0.0020         | <i>Xpsr1327b-1A</i> |
| 5A                                   | 2013 | 213.4         | 4.25 | 16.3           | 0.0030          | <i>Xpsr918b-5A</i>  |
| 5DL                                  | 2013 | 32.0          | 2.73 | 10.8           | -0.0048         | <i>Xpsr906a-5DL</i> |
| Average grain filling rate           |      |               |      |                |                 |                     |
| 1A                                   | 2012 | 80.1          | 3.04 | 18.1           | -0.0033         | <i>Xpsr1327b-1A</i> |
| 1DS                                  | 2013 | 0.1           | 3.30 | 12.9           | 0.0027          | <i>Xpsr168-1DS</i>  |
| 2A                                   | 2012 | 94.9          | 2.90 | 17.1           | -0.0032         | <i>Xpsr919b-2A</i>  |
|                                      | 2013 | 142.1         | 3.23 | 12.7           | -0.0026         | <i>Xglk699b-2AL</i> |
| 3B                                   | 2013 | 11.1          | 4.01 | 15.5           | 0.0034          | <i>Xpsr1196b-3B</i> |
|                                      | 2013 | 51.9          | 3.11 | 12.2           | 0.0026          | <i>Xpsr1101b-3B</i> |
| 4A                                   | 2012 | 19.7          | 3.86 | 22.4           | -0.0042         | <i>Xglk315-4AS</i>  |
| 5A                                   | 2013 | 210.9         | 9.41 | 32.6           | 0.0048          | <i>Xpsr918b-5A</i>  |
| 5DL                                  | 2012 | 39.0          | 3.34 | 19.7           | -0.0071         | <i>Xpsr580a-5DL</i> |
|                                      | 2013 | 39.0          | 5.71 | 21.2           | -0.0071         | <i>Xpsr580a-5DL</i> |
| 7B                                   | 2012 | 70.7          | 3.05 | 18.2           | 0.0034          | <i>Xglk549-7B</i>   |
|                                      | 2012 | 187.5         | 3.07 | 18.3           | 0.0049          | <i>Xglk750-7BL</i>  |

**Supplementary Table S2. (continued)**

| Trait/Chromosome                  | Year | Position (cM) | LOD  | R <sup>2</sup> | Additive effect | Closest marker      |
|-----------------------------------|------|---------------|------|----------------|-----------------|---------------------|
| <b>Maximum grain filling rate</b> |      |               |      |                |                 |                     |
| 1A                                | 2012 | 80.1          | 3.27 | 19.4           | -0.0082         | <i>Xpsr1327b-1A</i> |
| 2A                                | 2013 | 142.1         | 3.10 | 12.2           | -0.0072         | <i>Xglk699b-2AL</i> |
| 3B                                | 2013 | 13.1          | 3.10 | 12.2           | 0.0083          | <i>Xpsr1196b-3B</i> |
|                                   | 2013 | 51.9          | 3.06 | 12.0           | 0.0073          | <i>Xpsr1101b-3B</i> |
| 4A                                | 2012 | 18.7          | 3.35 | 19.8           | -0.0093         | <i>Xglk315-4AS</i>  |
| 5A                                | 2013 | 213.4         | 7.56 | 27.1           | 0.0116          | <i>Xpsr918b-5A</i>  |
| 5DL                               | 2013 | 37.0          | 4.74 | 18.0           | -0.0184         | <i>Xpsr580a-5DL</i> |
| <b>Grain 2</b>                    |      |               |      |                |                 |                     |
| <b>Rapid grain filling rate</b>   |      |               |      |                |                 |                     |
| 2A                                | 2012 | 94.9          | 3.90 | 22.6           | -0.0079         | <i>Xpsr919b-2A</i>  |
| 3B                                | 2013 | 56.9          | 4.88 | 18.5           | 0.0066          | <i>Xpsr1101b-3B</i> |
| 4A                                | 2012 | 18.7          | 3.62 | 21.2           | -0.0087         | <i>Xglk315-4AS</i>  |
| 7B                                | 2012 | 190.5         | 3.51 | 20.6           | 0.0112          | <i>Xmwig710a-7B</i> |
|                                   | 2013 | 74.6          | 3.22 | 12.6           | 0.0052          | <i>Xglk478-7BL</i>  |
|                                   | 2013 | 184.5         | 3.47 | 13.5           | 0.0075          | <i>Xglk750-7BL</i>  |
| <b>Late grain filling rate</b>    |      |               |      |                |                 |                     |
| 3B                                | 2013 | 57.9          | 3.26 | 12.8           | 0.0024          | <i>Xpsr116a-3B</i>  |
| <b>Average grain filling rate</b> |      |               |      |                |                 |                     |
| 2A                                | 2012 | 94.9          | 4.01 | 23.2           | -0.0035         | <i>Xpsr919b-2A</i>  |
|                                   | 2013 | 90.6          | 3.75 | 14.5           | -0.0023         | <i>Xpsr151-2A</i>   |
|                                   | 2013 | 130.6         | 3.38 | 13.2           | -0.0030         | <i>Xglk699b-2AL</i> |
| 2D                                | 2013 | 41.9          | 3.04 | 11.9           | 0.0048          | <i>Xpsr933b-2D</i>  |
| 3B                                | 2012 | 80.5          | 3.43 | 20.2           | 0.0034          | <i>Xpsr1054-3B</i>  |
|                                   | 2013 | 12.1          | 3.63 | 14.1           | 0.0027          | <i>Xpsr1196b-3B</i> |
|                                   | 2013 | 77.3          | 4.27 | 16.4           | 0.0027          | <i>Xpsr1054-3B</i>  |
| 4A                                | 2012 | 19.7          | 4.70 | 26.6           | -0.0044         | <i>Xglk315-4AS</i>  |
| 7B                                | 2012 | 190.5         | 4.05 | 23.4           | 0.0052          | <i>Xmwig710a-7B</i> |
|                                   | 2013 | 76.6          | 3.97 | 15.3           | 0.0027          | <i>Xglk478-7BL</i>  |
|                                   | 2013 | 183.5         | 4.12 | 15.8           | 0.0035          | <i>Xglk750-7BL</i>  |
| <b>Maximum grain filling rate</b> |      |               |      |                |                 |                     |
| 2A                                | 2012 | 94.9          | 3.69 | 21.5           | -0.0089         | <i>Xpsr919b-2A</i>  |
| 3B                                | 2013 | 56.9          | 4.80 | 18.2           | 0.0083          | <i>Xpsr1101b-3B</i> |
| 4A                                | 2012 | 18.7          | 3.81 | 22.2           | -0.0103         | <i>Xglk315-4AS</i>  |
| 7B                                | 2012 | 191.5         | 3.34 | 19.7           | 0.0125          | <i>Xmwig710a-7B</i> |
|                                   | 2013 | 74.6          | 3.20 | 12.5           | 0.0066          | <i>Xglk478-7BL</i>  |
|                                   | 2013 | 185.5         | 2.90 | 11.4           | 0.0088          | <i>Xglk750-7BL</i>  |
| <b>Onset of grain filling</b>     |      |               |      |                |                 |                     |
| 4A                                | 2012 | 0.1           | 3.54 | 20.8           | -15             | <i>Xglk752-4AS</i>  |
| <b>Grain filling duration</b>     |      |               |      |                |                 |                     |
| 3A                                | 2013 | 107.3         | 3.52 | 13.7           | 25.9            | <i>Xglk577-3AL</i>  |

**Supplementary Table S2. (continued)**

| Trait/Chromosome                | Year | Position (cM) | LOD  | R <sup>2</sup> | Additive effect | Closest marker      |
|---------------------------------|------|---------------|------|----------------|-----------------|---------------------|
| <b>Grain 3</b>                  |      |               |      |                |                 |                     |
| Rapid grain filling rate        |      |               |      |                |                 |                     |
| 1A                              | 2012 | 62.8          | 3.26 | 19.3           | -0.0147         | <i>Xpsr1327b-1A</i> |
| 2A                              | 2012 | 97.9          | 3.05 | 18.2           | -0.0085         | <i>Xglk293b-2AL</i> |
|                                 | 2013 | 88.9          | 3.44 | 13.4           | -0.0062         | <i>Xpsr386c-2A</i>  |
|                                 | 2013 | 127.6         | 4.24 | 16.2           | -0.0099         | <i>Xglk699b-2AL</i> |
| 3B                              | 2013 | 66.6          | 3.70 | 14.3           | 0.0074          | <i>Xpsr116a-3B</i>  |
| 4A                              | 2012 | 24.7          | 4.98 | 28.0           | -0.0119         | <i>Xpsr59a-4A</i>   |
|                                 | 2013 | 24.7          | 3.19 | 12.5           | -0.0071         | <i>Xpsr59a-4A</i>   |
| 7B                              | 2012 | 182.5         | 5.02 | 28.1           | 0.0146          | <i>Xglk750-7BL</i>  |
| Average grain filling rate      |      |               |      |                |                 |                     |
| 1A                              | 2012 | 70.8          | 3.07 | 18.3           | -0.0052         | <i>Xpsr1327b-1A</i> |
| 2A                              | 2012 | 94.9          | 5.01 | 28.1           | -0.0047         | <i>Xpsr919b-2A</i>  |
|                                 | 2013 | 90.9          | 4.92 | 18.6           | -0.0031         | <i>Xpsr151-2A</i>   |
|                                 | 2013 | 126.6         | 4.76 | 18.1           | -0.0044         | <i>Xglk699b-2AL</i> |
| 3DL                             | 2012 | 32.2          | 3.35 | 19.8           | 0.0039          | <i>Xpsr388-3DL</i>  |
| 4A                              | 2012 | 23.7          | 6.39 | 34.3           | -0.0061         | <i>Xpsr59a-4A</i>   |
| 4DL                             | 2012 | 86.0          | 3.25 | 19.2           | -0.0038         | <i>Xglk302b-4DL</i> |
| 7B                              | 2012 | 189.5         | 5.99 | 32.6           | 0.0075          | <i>Xmwig710a-7B</i> |
| Maximum grain filling rate      |      |               |      |                |                 |                     |
| 2A                              | 2012 | 87.3          | 4.26 | 24.4           | -0.0187         | <i>Xpsr135-2A</i>   |
| 4A                              | 2012 | 21.7          | 3.61 | 21.1           | -0.0203         | <i>Xpsr59a-4A</i>   |
| 7B                              | 2012 | 192.5         | 3.53 | 20.7           | 0.0249          | <i>Xmwig710a-7B</i> |
| Grain filling duration          |      |               |      |                |                 |                     |
| 5A                              | 2013 | 208.9         | 2.93 | 11.5           | -38.3           | <i>Xpsr918b-5A</i>  |
| <b>Grain water accumulation</b> |      |               |      |                |                 |                     |
| <b>Grain 1</b>                  |      |               |      |                |                 |                     |
| Maximum grain water content     |      |               |      |                |                 |                     |
| 1BS                             | 2013 | 39.9          | 3.32 | 13.0           | 2.47            | <i>Xgwm18-1BS</i>   |
| 2A                              | 2012 | 132.6         | 3.19 | 18.9           | -3.80           | <i>Xglk699b-2AL</i> |
| 2B                              | 2013 | 145.8         | 3.22 | 12.6           | -2.22           | <i>Xglk699a-2BS</i> |
| 3B                              | 2013 | 8.1           | 5.22 | 19.6           | 3.27            | <i>Lrk10c-3BS</i>   |
| 4A                              | 2012 | 20.7          | 4.70 | 26.6           | -3.84           | <i>Xglk315-4AS</i>  |
| 5A                              | 2012 | 209.9         | 4.36 | 24.9           | 3.83            | <i>Xpsr918b-5A</i>  |
|                                 | 2013 | 209.9         | 9.37 | 32.4           | 4.18            | <i>Xpsr918b-5A</i>  |
| 5DL                             | 2012 | 41.0          | 4.21 | 24.2           | -6.40           | <i>Xpsr580a-5DL</i> |
|                                 | 2013 | 40.0          | 6.34 | 23.3           | -6.36           | <i>Xpsr580a-5DL</i> |
| 7B                              | 2012 | 71.7          | 3.46 | 20.3           | 3.03            | <i>Xglk549-7B</i>   |
|                                 | 2012 | 193.5         | 3.88 | 22.5           | 4.36            | <i>Xmwig710a-7B</i> |
| 7D                              | 2013 | 81.8          | 3.68 | 14.3           | 2.69            | <i>Xpsr662-7D</i>   |



**Supplementary Table S2. (continued)**

| Trait/Chromosome                    | Year | Position (cM) | LOD  | R <sup>2</sup> | Additive effect | Closest marker      |
|-------------------------------------|------|---------------|------|----------------|-----------------|---------------------|
| Water absorption rate               |      |               |      |                |                 |                     |
| 2A                                  | 2012 | 133.6         | 4.34 | 24.8           | -0.0085         | <i>Xglk699b-2AL</i> |
| 3A                                  | 2013 | 123.5         | 3.68 | 14.3           | -0.0071         | <i>Xglk652a-3AL</i> |
| 3B                                  | 2013 | 10.1          | 3.16 | 12.4           | 0.0063          | <i>Lrk10c-3BS</i>   |
| 4A                                  | 2012 | 49.1          | 3.92 | 22.7           | -0.0070         | <i>CD16.2-4A</i>    |
| 5A                                  | 2012 | 211.9         | 5.27 | 29.3           | 0.0081          | <i>Xpsr918b-5A</i>  |
|                                     | 2013 | 210.9         | 8.42 | 29.7           | 0.0094          | <i>Xpsr918b-5A</i>  |
| 5DL                                 | 2012 | 45.0          | 4.54 | 25.8           | -0.0125         | <i>Xpsr580a-5DL</i> |
|                                     | 2013 | 32.0          | 5.03 | 19.0           | -0.0138         | <i>Xpsr906a-5DL</i> |
| 6A                                  | 2013 | 2.0           | 3.27 | 12.8           | -0.0058         | <i>Xpsr008-6A</i>   |
| 7B                                  | 2012 | 68.3          | 3.29 | 19.4           | 0.0059          | <i>Xglk549-7B</i>   |
|                                     | 2012 | 194.5         | 3.24 | 19.2           | 0.0079          | <i>Xmwg710a-7B</i>  |
|                                     | 2013 | 67.3          | 3.14 | 12.3           | 0.0057          | <i>Xglk598-7BL</i>  |
| 7D                                  | 2012 | 74.7          | 3.38 | 19.9           | 0.0058          | <i>Xgwm44-7D</i>    |
| Water loss rate                     |      |               |      |                |                 |                     |
| 1BS                                 | 2012 | 32.8          | 3.24 | 19.2           | 0.0060          | <i>Xpsr634-1BS</i>  |
| 2B                                  | 2013 | 147.8         | 3.02 | 11.9           | -0.0034         | <i>Xglk699a-2BS</i> |
| 3B                                  | 2013 | 0.1           | 4.85 | 18.4           | 0.0043          | <i>Xglk683-3BS</i>  |
| 4A                                  | 2012 | 19.7          | 4.43 | 25.3           | -0.0078         | <i>Xglk315-4AS</i>  |
|                                     | 2013 | 32.2          | 3.75 | 14.5           | -0.0043         | <i>Xpsr59a-4A</i>   |
| 5A                                  | 2013 | 210.9         | 5.31 | 19.9           | 0.0049          | <i>Xpsr918b-5A</i>  |
| 5DL                                 | 2013 | 47.0          | 5.02 | 18.9           | -0.0079         | <i>Xpsr580a-5DL</i> |
| 7B                                  | 2012 | 193.5         | 3.26 | 19.3           | 0.0085          | <i>Xmwg710a-7B</i>  |
| 7D                                  | 2013 | 82.8          | 4.13 | 15.9           | 0.0044          | <i>Xpsr662-7D</i>   |
| Time at maximum grain water content |      |               |      |                |                 |                     |
| 3A                                  | 2013 | 108.3         | 3.51 | 13.7           | 13.7            | <i>Xglk577-3AL</i>  |
| 6B                                  | 2013 | 55.7          | 3.12 | 12.2           | -27.4           | <i>Xpsr964-6B</i>   |
| <b>Grain 2</b>                      |      |               |      |                |                 |                     |
| Maximum grain water content         |      |               |      |                |                 |                     |
| 2A                                  | 2012 | 94.9          | 3.21 | 19.0           | -2.47           | <i>Xpsr919b-2A</i>  |
|                                     | 2013 | 156.0         | 3.60 | 14.0           | -2.07           | <i>Xpsr630-2A</i>   |
| 2B                                  | 2013 | 145.8         | 3.16 | 12.4           | -1.90           | <i>Xglk699a-2BS</i> |
| 3B                                  | 2012 | 80.5          | 3.49 | 20.5           | 2.66            | <i>Xpsr1054-3B</i>  |
|                                     | 2013 | 8.1           | 5.50 | 20.6           | 2.89            | <i>Lrk10c-3BS</i>   |
|                                     | 2013 | 80.5          | 4.86 | 18.4           | 2.44            | <i>Xpsr1054-3B</i>  |
| 4A                                  | 2012 | 19.7          | 7.02 | 37.0           | -3.97           | <i>Xglk315-4AS</i>  |
|                                     | 2013 | 33.2          | 3.78 | 14.6           | -2.44           | <i>Xpsr914-4A</i>   |
| 5B                                  | 2012 | 156.2         | 3.02 | 18.0           | -2.81           | <i>Xpsr580b-5B</i>  |
| 5DL                                 | 2013 | 42.0          | 3.96 | 15.3           | -4.35           | <i>Xpsr580a-5DL</i> |
| 7B                                  | 2012 | 71.7          | 3.26 | 19.3           | 2.62            | <i>Xglk549-7B</i>   |
|                                     | 2012 | 193.5         | 5.45 | 30.1           | 4.47            | <i>Xmwg710a-7B</i>  |
|                                     | 2013 | 68.3          | 5.07 | 19.1           | 2.59            | <i>Xglk549-7B</i>   |
|                                     | 2013 | 184.5         | 4.46 | 17.0           | 3.32            | <i>Xglk750-7BL</i>  |
| 7D                                  | 2013 | 83.8          | 3.29 | 12.9           | 2.28            | <i>Xpsr662-7D</i>   |

**Supplementary Table S2. (continued)**

| Trait/Chromosome                    | Year | Position (cM) | LOD  | R <sup>2</sup> | Additive effect | Closest marker      |
|-------------------------------------|------|---------------|------|----------------|-----------------|---------------------|
| Water absorption rate               |      |               |      |                |                 |                     |
| 2A                                  | 2012 | 124.6         | 3.26 | 19.3           | -0.0069         | <i>Xglk687a-2AL</i> |
|                                     | 2013 | 88.3          | 3.09 | 12.1           | -0.0047         | <i>Xpsr386c-2A</i>  |
| 3B                                  | 2013 | 10.1          | 3.41 | 13.3           | 0.0059          | <i>Lrk10c-3BS</i>   |
| 4A                                  | 2012 | 21.7          | 4.15 | 23.9           | -0.0061         | <i>Xpsr59a-4A</i>   |
| 5B                                  | 2012 | 159.2         | 3.49 | 20.5           | -0.0059         | <i>Xpsr580b-5B</i>  |
| 5DL                                 | 2013 | 31.0          | 3.05 | 12.0           | -0.0098         | <i>Xpsr906a-5DL</i> |
| 7B                                  | 2012 | 70.7          | 3.85 | 22.4           | 0.0052          | <i>Xglk549-7B</i>   |
|                                     | 2012 | 193.5         | 4.91 | 27.6           | 0.0081          | <i>Xmwig710a-7B</i> |
|                                     | 2013 | 67.3          | 5.70 | 21.2           | 0.0068          | <i>Xglk598-7BL</i>  |
|                                     | 2013 | 180.5         | 3.25 | 12.7           | 0.0067          | <i>Xglk750-7BL</i>  |
| Water loss rate                     |      |               |      |                |                 |                     |
| 2A                                  | 2013 | 7.0           | 4.07 | 15.7           | -0.0037         | <i>Xpsr566c-2A</i>  |
| 3B                                  | 2013 | 6.1           | 3.39 | 13.2           | 0.0038          | <i>Lrk10c-3BS</i>   |
|                                     | 2013 | 80.5          | 3.36 | 13.1           | 0.0035          | <i>Xpsr1054-3B</i>  |
| 4A                                  | 2012 | 20.7          | 5.30 | 29.4           | -0.0091         | <i>Xglk315-4AS</i>  |
|                                     | 2013 | 21.7          | 7.29 | 26.3           | -0.0058         | <i>Xpsr59a-4A</i>   |
| 6A                                  | 2012 | 78.2          | 4.27 | 24.5           | 0.0101          | <i>Xpsr966-6A</i>   |
| 7B                                  | 2012 | 195.5         | 3.46 | 20.4           | 0.0091          | <i>Xmwig710a-7B</i> |
|                                     | 2013 | 190.5         | 3.74 | 14.5           | 0.0053          | <i>Xmwig710a-7B</i> |
| Time at maximum grain water content |      |               |      |                |                 |                     |
| 3A                                  | 2013 | 112.5         | 3.84 | 14.8           | 15.5            | <i>Xglk577-3AL</i>  |
| 4A                                  | 2012 | 0.1           | 3.14 | 18.7           | -16.9           | <i>Xglk752-4AS</i>  |
| <b>Grain 3</b>                      |      |               |      |                |                 |                     |
| Maximum grain water content         |      |               |      |                |                 |                     |
| 2A                                  | 2013 | 8.9           | 4.03 | 15.5           | -2.18           | <i>Xpsr566c-2A</i>  |
|                                     | 2013 | 88.9          | 4.18 | 16.1           | -2.14           | <i>Xpsr386c-2A</i>  |
| 3B                                  | 2013 | 80.3          | 3.23 | 12.6           | 2.03            | <i>Xpsr1054-3B</i>  |
| 4A                                  | 2012 | 23.7          | 4.67 | 26.5           | -3.55           | <i>Xpsr59a-4A</i>   |
|                                     | 2013 | 21.7          | 5.12 | 19.3           | -2.87           | <i>Xpsr59a-4A</i>   |
| 4DL                                 | 2012 | 95.0          | 3.07 | 18.3           | -3.28           | <i>Xglk302b-4DL</i> |
| 7B                                  | 2012 | 190.5         | 4.45 | 25.4           | 4.41            | <i>Xmwig710a-7B</i> |
|                                     | 2013 | 65.3          | 4.67 | 17.8           | 2.40            | <i>Xglk598-7BL</i>  |
|                                     | 2013 | 190.5         | 4.64 | 17.6           | 3.44            | <i>Xmwig710a-7B</i> |
| Water absorption rate               |      |               |      |                |                 |                     |
| 2A                                  | 2013 | 88.9          | 3.44 | 13.4           | -0.0041         | <i>Xpsr386c-2A</i>  |
| 7B                                  | 2013 | 66.3          | 5.24 | 19.7           | 0.0054          | <i>Xglk598-7BL</i>  |
|                                     | 2013 | 189.5         | 3.19 | 12.5           | 0.0061          | <i>Xmwig710a-7B</i> |
| Water loss rate                     |      |               |      |                |                 |                     |
| 2A                                  | 2013 | 7.0           | 3.87 | 15.0           | -0.0045         | <i>Xpsr566c-2A</i>  |
|                                     | 2013 | 117.6         | 4.18 | 16.0           | -0.0061         | <i>Xglk687a-2AL</i> |
| 4A                                  | 2012 | 22.7          | 5.18 | 28.9           | -0.0114         | <i>Xpsr59a-4A</i>   |
|                                     | 2013 | 21.7          | 6.54 | 24.0           | -0.0068         | <i>Xpsr59a-4A</i>   |
| 7B                                  | 2012 | 184.5         | 3.90 | 22.6           | 0.0125          | <i>Xmwig710a-7B</i> |
|                                     | 2013 | 195.5         | 4.83 | 18.3           | 0.0070          | <i>Xmwig710a-7B</i> |
| Time at maximum grain water content |      |               |      |                |                 |                     |
| 4A                                  | 2012 | 19.7          | 3.63 | 21.2           | -34.6           | <i>Xglk315-4AS</i>  |

**Supplementary Table S2. (continued)**

| Trait/Chromosome                    | Year | Position (cM) | LOD | R <sup>2</sup> | Additive effect | Closest marker      |
|-------------------------------------|------|---------------|-----|----------------|-----------------|---------------------|
| <b>Grain dimensions at maturity</b> |      |               |     |                |                 |                     |
| Grain length                        |      |               |     |                |                 |                     |
| 1DS                                 | 2013 | 0.1           | 3.0 | 6.6            | 0.10            | <i>Xpsr168-1DS</i>  |
| 2A                                  | 2012 | 123.7         | 3.1 | 18.2           | -0.26           | <i>Xglk687a-2AL</i> |
|                                     | 2013 | 143.1         | 8.6 | 17.9           | -0.16           | <i>PL_AP-2A</i>     |
| 3B                                  | 2012 | 84.5          | 5.0 | 28.2           | 0.26            | <i>Xpsr1054-3B</i>  |
|                                     | 2013 | 79.3          | 6.5 | 13.7           | 0.15            | <i>Xpsr1054-3B</i>  |
| 4A                                  | 2012 | 23.7          | 5.8 | 31.8           | -0.27           | <i>Xpsr59a-4A</i>   |
| 5A                                  | 2013 | 110.2         | 3.1 | 6.9            | -0.11           | <i>Xpsr911-5A</i>   |
| 7B                                  | 2012 | 215.8         | 3.8 | 22.1           | 0.20            | <i>Xglk576-7BL</i>  |
| Grain width                         |      |               |     |                |                 |                     |
| 2D                                  | 2013 | 99.1          | 4.3 | 9.4            | -0.04           | <i>Xpsr932-2D</i>   |
| 5A                                  | 2013 | 67.4          | 3.8 | 8.3            | 0.04            | <i>Xglk424-5A</i>   |
| Grain height                        |      |               |     |                |                 |                     |
| 1BS                                 | 2013 | 31.0          | 4.4 | 9.5            | 0.04            | <i>Xglk317a-1BS</i> |
| 4A                                  | 2012 | 43.1          | 4.6 | 26.1           | -0.09           | <i>Xpsr914-4A</i>   |
|                                     | 2013 | 34.2          | 5.9 | 12.5           | -0.06           | <i>Xpsr914-4A</i>   |
| 5A                                  | 2013 | 209.9         | 7.4 | 15.5           | 0.07            | <i>Xpsr918b-5A</i>  |
| 5DL                                 | 2012 | 35.0          | 3.9 | 22.5           | -0.16           | <i>Xpsr580a-5DL</i> |
|                                     | 2013 | 37.0          | 6.9 | 14.5           | -0.12           | <i>Xpsr580a-5DL</i> |
| 7B                                  | 2012 | 79.6          | 3.8 | 22.0           | 0.09            | <i>Xglk478-7BL</i>  |
|                                     | 2012 | 184.5         | 7.6 | 39.5           | 0.15            | <i>Xglk750-7BL</i>  |
| Grain volume                        |      |               |     |                |                 |                     |
| 1A                                  | 2012 | 80.1          | 3.7 | 21.6           | -2.0            | <i>Xpsr1327b-1A</i> |
| 1BS                                 | 2013 | 31.0          | 3.1 | 6.8            | 0.8             | <i>Xglk317a-1BS</i> |
| 2A                                  | 2012 | 122.6         | 3.2 | 18.9           | -2.7            | <i>Xglk687a-2AL</i> |
|                                     | 2013 | 6.0           | 3.8 | 8.4            | -0.9            | <i>Xpsr566c-2A</i>  |
|                                     | 2013 | 126.6         | 6.1 | 13.1           | -1.5            | <i>Xglk699b-2AL</i> |
| 3B                                  | 2012 | 80.5          | 3.8 | 22.0           | 2.1             | <i>Xpsr1054-3B</i>  |
|                                     | 2013 | 1.9           | 3.9 | 8.4            | 0.9             | <i>C970a-3B</i>     |
|                                     | 2013 | 85.5          | 4.5 | 9.7            | 1.1             | <i>Xpsr1054-3B</i>  |
| 4A                                  | 2012 | 21.7          | 6.6 | 35.1           | -3.0            | <i>Xpsr59a-4A</i>   |
|                                     | 2013 | 31.2          | 6.6 | 14.0           | -1.3            | <i>Xpsr59a-4A</i>   |
| 5DL                                 | 2013 | 41.0          | 4.0 | 8.7            | -1.8            | <i>Xpsr580a-5DL</i> |
| 7B                                  | 2012 | 78.6          | 3.8 | 22.3           | 2.4             | <i>Xglk478-7BL</i>  |
|                                     | 2012 | 184.5         | 7.0 | 36.7           | 3.8             | <i>Xglk750-7BL</i>  |
| Grain length/width                  |      |               |     |                |                 |                     |
| 1DS                                 | 2013 | 1.0           | 3.7 | 8.1            | 0.04            | <i>Xpsr168-1DS</i>  |
| 2A                                  | 2013 | 152.5         | 6.5 | 13.7           | -0.05           | <i>Xglk278b-2AL</i> |
| 2B                                  | 2013 | 190.1         | 3.0 | 6.6            | -0.04           | <i>Xpsr644b-2B</i>  |
| 2D                                  | 2013 | 101.1         | 5.7 | 12.1           | 0.05            | <i>Xpsr540-2D</i>   |
| 3B                                  | 2013 | 54.9          | 3.1 | 6.7            | 0.04            | <i>Xpsr1101b-3B</i> |
| 5A                                  | 2013 | 68.4          | 5.5 | 11.7           | -0.06           | <i>Xglk424-5A</i>   |
| Grain length/height                 |      |               |     |                |                 |                     |
| 3B                                  | 2013 | 61.6          | 4.5 | 9.7            | 0.06            | <i>Xpsr116a-3B</i>  |
| 5A                                  | 2012 | 207.9         | 3.5 | 20.4           | -0.08           | <i>Xpsr1194-5A</i>  |

**Supplementary Table S3.** Quantitative trait locus (QTL) coincidences between final grain weight and grain filling traits

| Chromosome                  | No. of QTL for Fgw <sup>a</sup> | No. of QTL coincident with those for Fgw |      |      |      |      |      |     |     |      |     |     |     |      |    |    |    |    |    |    |
|-----------------------------|---------------------------------|------------------------------------------|------|------|------|------|------|-----|-----|------|-----|-----|-----|------|----|----|----|----|----|----|
|                             |                                 | Cs                                       | Igfr | Rgfr | Lgfr | Agfr | Mgfr | Ogf | Gfd | Tmax | Mwc | War | Wlr | Tmwc | Gl | Gw | Gh | Gv | Lw | Lh |
| 2B                          | 1                               |                                          |      |      |      |      |      |     |     |      | 2   |     |     | 1    |    |    |    |    |    |    |
| 2A.1 <sup>b</sup>           | 2                               |                                          |      | 3    |      | 5    | 2    |     |     |      | 2   | 2   |     |      |    |    |    |    |    |    |
| 2A.2                        | 2                               | 1                                        | 1    | 2    |      | 3    | 1    |     |     |      | 2   | 2   | 1   | 2    |    |    |    | 2  | 1  |    |
| 3B.1                        | 2                               | 2                                        |      | 1    |      | 2    | 1    |     |     |      | 2   | 2   | 2   |      |    |    |    | 1  |    |    |
| 3B.2                        | 3                               |                                          |      |      |      | 1    |      |     |     |      | 3   |     | 1   |      | 2  |    |    |    | 2  |    |
| 4A                          | 5                               | 2                                        | 1    | 4    |      | 3    | 3    | 1   |     |      | 5   | 2   | 6   | 2    | 1  |    |    | 2  | 2  |    |
| 5A                          | 2                               | 1                                        | 1    | 1    | 1    | 1    | 1    |     | 1   |      | 2   | 2   | 1   |      |    |    |    | 1  |    |    |
| 5DL                         | 2                               | 2                                        | 1    | 1    | 1    | 2    | 1    |     |     |      | 3   | 3   | 1   |      |    |    |    | 2  | 1  |    |
| 7B.1                        | 2                               | 1                                        |      | 1    |      | 2    | 1    |     |     |      | 4   | 5   |     |      |    |    |    | 1  | 1  |    |
| 7B.2                        | 3                               |                                          | 1    | 3    |      | 4    | 3    |     |     |      | 5   | 4   | 5   | 1    |    |    |    | 1  | 1  |    |
| 7D                          | 2                               |                                          |      |      |      |      |      |     |     |      | 2   | 1   | 1   |      |    |    |    |    |    |    |
| Total coincident QTL        | –                               | 9                                        | 5    | 16   | 2    | 23   | 13   | 1   | 1   | 0    | 32  | 23  | 19  | 2    | 6  | 0  | 7  | 10 | 1  | 1  |
| Total QTL detected          | 26                              | 13                                       | 5    | 22   | 4    | 31   | 16   | 1   | 2   | 0    | 36  | 26  | 23  | 5    | 8  | 2  | 8  | 13 | 6  | 2  |
| Proportion (%) <sup>c</sup> | –                               | 69                                       | 100  | 73   | 50   | 74   | 81   | 100 | 50  | –    | 89  | 88  | 83  | 40   | 75 | 0  | 88 | 77 | 17 | 50 |

<sup>a</sup> Trait abbreviations: Fgw, final grain weight; Cs, carpel size; Igfr, initial grain filling rate; Rgfr, rapid grain filling rate; Lgfr, late grain filling rate; Agfr, average grain filling rate; Mgfr, maximum grain filling rate; Ogfr, onset of grain filling; Gfd, grain filling duration; Tmax, the time at maximum grain filling rate; Mwc, grain maximum water content; War, grain water absorption rate; Wlr, grain water loss rate; Tmwc, the time at maximum grain water content; Gl, grain length; Gw, grain width; Gh, grain height; Gv, grain volume; Lw, grain length/width (L/W); Lh, grain length/height (L/H).

<sup>b</sup> Serial number following the chromosome name indicates multiple QTL regions on the same chromosome.

<sup>c</sup> Percentage of the QTL coincident with those for final grain weight to the total QTL number detected for each trait.

**Supplementary Table S4.** Quantitative trait locus (QTL) coincidences between carpel size and the other grain filling traits

| Chromosome                  | No. of QTL for Cs <sup>a</sup> | No. of QTL coincident with those for Cs |      |      |      |      |     |     |      |     |     |     |      |    |    |    |    |    |    |
|-----------------------------|--------------------------------|-----------------------------------------|------|------|------|------|-----|-----|------|-----|-----|-----|------|----|----|----|----|----|----|
|                             |                                | Igfr                                    | Rgfr | Lgfr | Agfr | Mgfr | Ogf | Gfd | Tmax | Mwc | War | Wlr | Tmwc | Gl | Gw | Gh | Gv | Lw | Lh |
| 2A                          | 1                              | 1                                       | 2    |      | 3    | 1    |     |     |      | 2   | 2   | 1   |      | 2  |    |    | 2  | 1  |    |
| 3B                          | 2                              |                                         | 1    |      | 2    | 1    |     |     |      | 2   | 2   | 2   |      |    |    |    | 1  |    |    |
| 4A                          | 2                              | 1                                       | 4    |      | 3    | 3    | 1   |     |      | 5   | 2   | 6   | 2    | 1  |    | 2  | 2  |    |    |
| 5A.1 <sup>b</sup>           | 2                              |                                         |      |      |      |      |     |     |      |     |     |     |      |    | 1  |    |    | 1  |    |
| 5A.2                        | 1                              | 1                                       | 1    | 1    | 1    | 1    |     | 1   |      | 2   | 2   | 1   |      |    |    | 1  |    |    | 1  |
| 5B                          | 1                              |                                         |      |      |      |      |     |     |      |     |     |     |      |    |    |    |    |    |    |
| 5DL                         | 2                              | 1                                       | 1    | 1    | 2    | 1    |     |     |      | 3   | 3   | 1   |      |    |    | 2  | 1  |    |    |
| 6A                          | 1                              |                                         |      |      |      |      |     |     |      |     | 1   |     |      |    |    |    |    |    |    |
| 7B                          | 1                              |                                         | 1    |      | 2    | 1    |     |     |      | 4   | 5   |     |      |    |    | 1  | 1  |    |    |
| Total coincident QTL        | –                              | 4                                       | 10   | 2    | 13   | 8    | 1   | 1   | 0    | 18  | 17  | 11  | 2    | 3  | 1  | 6  | 7  | 2  | 1  |
| Total QTL detected          | 13                             | 5                                       | 22   | 4    | 31   | 16   | 1   | 2   | 0    | 36  | 26  | 23  | 5    | 8  | 2  | 8  | 13 | 6  | 2  |
| Proportion (%) <sup>c</sup> | –                              | 80                                      | 45   | 50   | 42   | 50   | 100 | 50  | –    | 50  | 65  | 48  | 40   | 38 | 50 | 75 | 54 | 33 | 50 |

<sup>a</sup> Trait abbreviations: Cs, carpel size; Igfr, initial grain filling rate; Rgfr, rapid grain filling rate; Lgfr, late grain filling rate; Agfr, average grain filling rate; Mgfr, maximum grain filling rate; Ogfr, onset of grain filling; Gfd, grain filling duration; Tmax, the time at maximum grain filling rate; Mwc, grain maximum water content; War, grain water absorption rate; Wlr, grain water loss rate; Tmwc, the time at maximum grain water content; Gl, grain length; Gw, grain width; Gh, grain height; Gv, grain volume; Lw, grain length/width (L/W); Lh, grain length/height (L/H).

<sup>b</sup> Serial number following the chromosome name indicates multiple QTL regions on the same chromosome.

<sup>c</sup> Percentage of the QTL coincident with those for carpel size to the total QTL number detected for each trait.

**Supplementary Table S5. Quantitative trait locus (QTL) number detected for Grain 1, 2 and**

3

| Grain   | Fgw <sup>a</sup> | Cs | Igfr | Rgfr | Lgfr | Agfr | Mgfr | Ogf | Gfd | Tmax | Mwc | War | Wlr | Tmwc |
|---------|------------------|----|------|------|------|------|------|-----|-----|------|-----|-----|-----|------|
| Grain 1 | 11               | 7  | 5    | 8    | 3    | 12   | 7    | 0   | 0   | 0    | 12  | 13  | 9   | 2    |
| Grain 2 | 8                | 4  | 0    | 6    | 1    | 11   | 6    | 1   | 1   | 0    | 15  | 10  | 8   | 2    |
| Grain 3 | 7                | 2  | 0    | 8    | 0    | 8    | 3    | 0   | 1   | 0    | 9   | 3   | 6   | 1    |
| Total   | 26               | 13 | 5    | 22   | 4    | 31   | 16   | 1   | 2   | 0    | 36  | 26  | 23  | 5    |

<sup>a</sup> Trait abbreviations: Fgw, final grain weight; Cs, carpel size; Igfr, initial grain filling rate; Rgfr, rapid grain filling rate; Lgfr, late grain filling rate; Agfr, average grain filling rate; Mgfr, maximum grain filling rate; Ogfr, onset of grain filling; Gfd, grain filling duration; Tmax, the time at maximum grain filling rate; Mwc, grain maximum water content; War, grain water absorption rate; Wlr, grain water loss rate; Tmwc, the time at maximum grain water content.

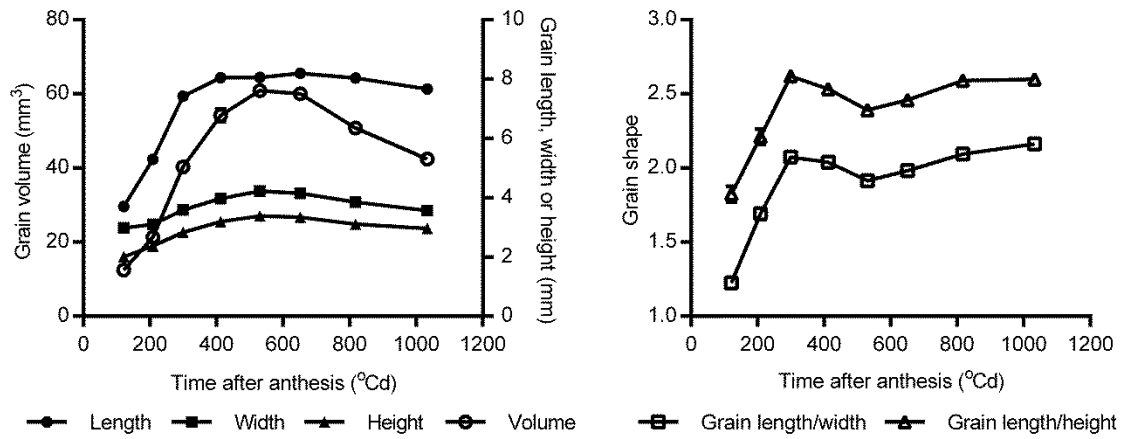

**Supplementary Fig. S1.** Grain expansion dynamics in 2013. Bars depict the standard errors of the means (SEM).

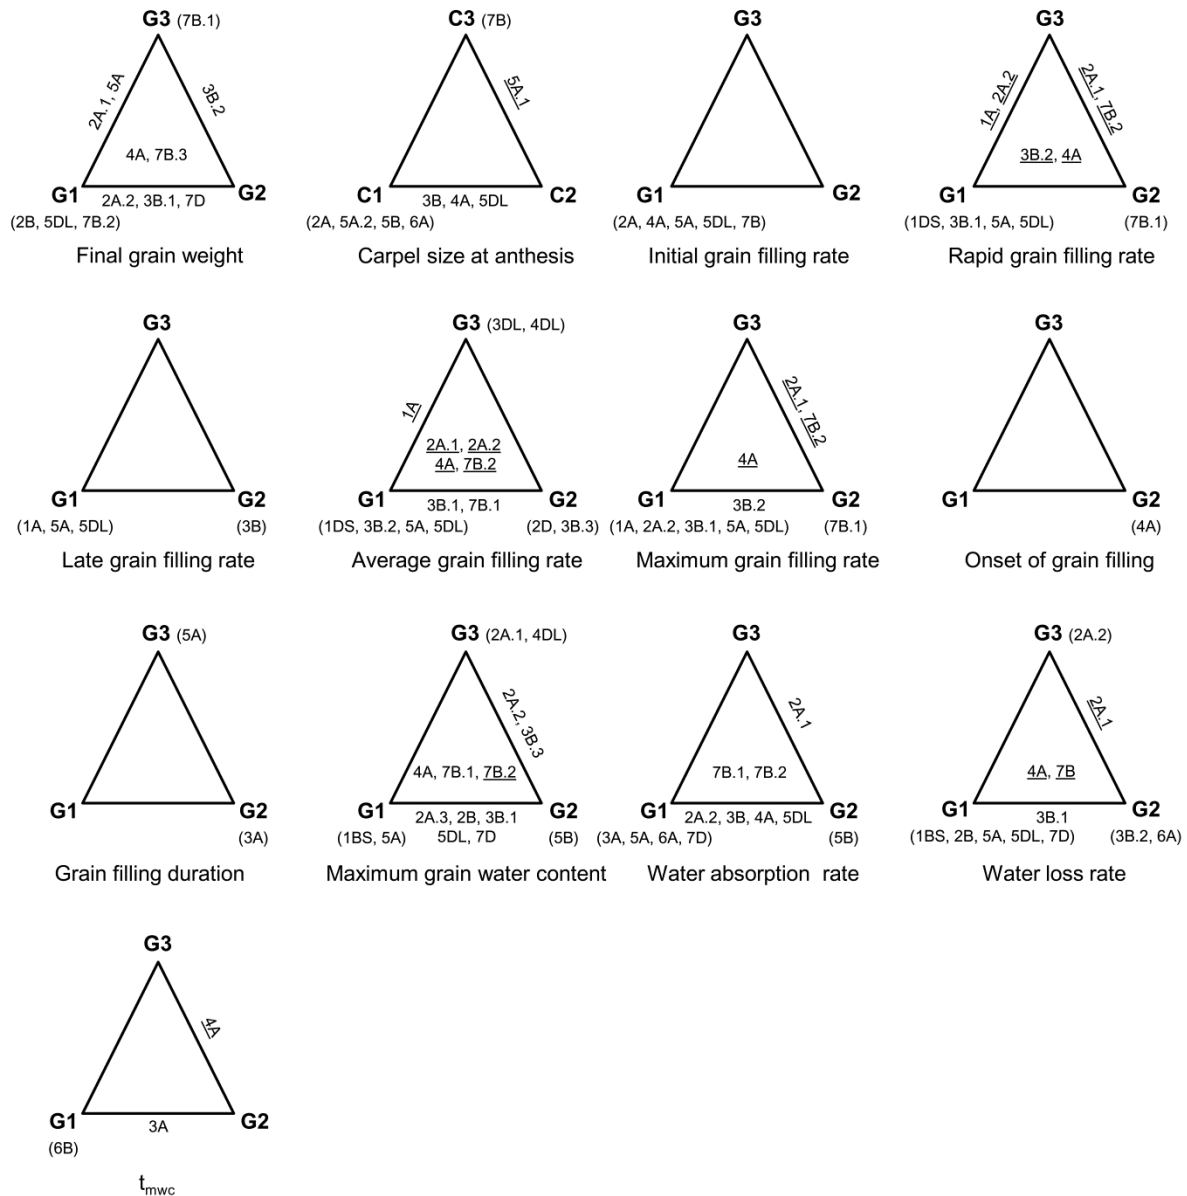

**Supplementary Fig. S2.** Quantitative trait locus (QTL) comparisons between different grains within spikelets. C1 (G1), C2 (G2) and C3 (G3) represent Carpel 1 (Grain 1), Carpel 2 (Grain 2), and Carpel 3 (Grain 3), respectively. Chromosome names following G1 (C1), G2 (C2), and G3 (C3) in the parentheses show the locations of position-specific QTL. Serial numbers after chromosome names indicate multiple QTL detected on the same chromosomes for a trait. The shared QTL with higher additive effects in G3 (C3) are marked by the underlines. The QTL shared by any two of the grains are placed at the middles outside the triangles, while these shared by all the three grains are placed inside the triangles. Trait abbreviation:  $t_{mwc}$ , the time at maximum grain water content.
